# Supplementary material for: Association between dietary zinc intake and mortality among Chinese adults: findings from 10-year follow-up in the Jiangsu Nutrition Study
Source: Springer Nature journal article supplement (doi:10.1007/s00394-017-1551-7), 2017-10-11
Supplement: MOESM1 [file 15126804]

European Journal of Nutrition

**Association between dietary zinc intake and mortality among Chinese adults: findings from 10-year follow-up in the Jiangsu Nutrition Study**

Zumin Shi, Anna Chu, Shiqi Zhen, Anne W Taylor, Yue Dai, Malcolm Riley, Samir Samman

**Corresponding author**:

Associate Professor Zumin Shi

Discipline of Medicine, University of Adelaide, Level 7, SAHMRI, North Terrace, Adelaide, Australia, 5005. Phone: +61 8 8313 1188; Fax: +61 8 8313 1228; Email: [Zumin.shi@adelaide.edu.au](mailto:Zumin.shi@adelaide.edu.au)

SUPPLEMENTARY FILES

**Supplement Figure 1** Association between lead intake and zinc intake

**Supplement Table 1** Correlation matrix between absolute zinc and other nutrients and lead intake

|  | Zinc | Magnesium | Iron | Manganese | Copper | Protein | Fat | Carbohydrate | Lead |
| --- | --- | --- | --- | --- | --- | --- | --- | --- | --- |
|  |  |  |  |  |  |  |  |  |  |
| Zinc | 1.00 |  |  |  |  |  |  |  |  |
| Magnesium | 0.73 | 1.00 |  |  |  |  |  |  |  |
| Iron | 0.66 | 0.77 | 1.00 |  |  |  |  |  |  |
| Manganese | 0.71 | 0.78 | 0.59 | 1.00 |  |  |  |  |  |
| Copper | 0.67 | 0.75 | 0.63 | 0.69 | 1.00 |  |  |  |  |
| Protein | 0.84 | 0.68 | 0.65 | 0.63 | 0.66 | 1.00 |  |  |  |
| Fat | 0.50 | 0.29 | 0.32 | 0.24 | 0.26 | 0.53 | 1.00 |  |  |
| Carbohydrate | 0.66 | 0.70 | 0.58 | 0.73 | 0.64 | 0.55 | 0.19 | 1.00 |  |
| Lead | 0.68 | 0.42 | 0.37 | 0.64 | 0.42 | 0.61 | 0.33 | 0.59 | 1.00 |

p values were all <0.001
